# Supplementary material for: Hybrid origins of Australian honeybees (Apis mellifera)
Source: Springer Nature journal article supplement (doi:10.1007/s13592-015-0371-0), 2015-06-15
Supplement: MOESM1 [file 13592_2015_371_MOESM1_ESM.pdf]

**Hybrid origins of Australian honey bees (*Apis mellifera*)**

Nadine C. Chapman\*, Brock A. Harpur, Julianne Lim, Thomas E. Rinderer, Michael H. Allsopp, Amro Zayed, Benjamin P. Oldroyd

\* Corresponding author:

Address:

Behaviour and Genetics of Social Insects Laboratory, School of Biological Sciences  
A12, University of Sydney, Sydney NSW 2006, Australia

Email :

[nadine.chapman@sydney.edu.au](mailto:nadine.chapman@sydney.edu.au)

Supplementary Information: the sample ID, population (commercial or feral Australian) and location the sample was collected from and the type of sample (worker or drone)

| ID            | Population | Location         | Type   |
|---------------|------------|------------------|--------|
| 01/11/2013/39 | Commercial | Norfolk_Island   | Worker |
| 01/11/2013/41 | Commercial | Norfolk_Island   | Worker |
| 01/11/2013/38 | Commercial | Norfolk_Island   | Worker |
| 01/11/2013/43 | Commercial | Norfolk_Island   | Worker |
| 01/11/2013/42 | Commercial | Norfolk_Island   | Worker |
| 01/11/2013/40 | Commercial | Norfolk_Island   | Worker |
| 03/10/2013/1  | Commercial | NSW_Darlinghurst | Drone  |
| 5A01          | Commercial | NSW_Kathida      | Worker |
| 5C02          | Commercial | NSW_Nambucca     | Worker |
| 5D02          | Commercial | NSW_Nambucca     | Worker |
| 5A02          | Commercial | NSW_Nambucca     | Worker |
| 5E02          | Commercial | NSW_Nambucca     | Worker |
| 5B02          | Commercial | NSW_Nambucca     | Worker |
| 5H03          | Commercial | NSW_Narrabri     | Worker |
| 9B02          | Commercial | NSW_Richmond     | Worker |
| 9H01          | Commercial | NSW_Richmond     | Worker |
| 9G01          | Commercial | NSW_Richmond     | Worker |
| 9A02          | Commercial | NSW_Richmond     | Worker |
| 5H01          | Commercial | NSW_Rylson       | Worker |
| 5E01          | Commercial | NSW_Rylson       | Worker |
| 5D01          | Commercial | NSW_Rylson       | Worker |
| 5C01          | Commercial | NSW_Rylson       | Worker |
| 5F01          | Commercial | NSW_Rylson       | Worker |
| 5G01          | Commercial | NSW_Rylson       | Worker |
| 5B03          | Commercial | QLD_Bundaberg    | Worker |
| 5G02          | Commercial | QLD_Bundaberg    | Worker |
| 5A03          | Commercial | QLD_Bundaberg    | Worker |
| 5H02          | Commercial | QLD_Bundaberg    | Worker |
| 5F02          | Commercial | QLD_Bundaberg    | Worker |
| 5B11          | Commercial | QLD_Cairns       | Worker |
| 5E10          | Commercial | QLD_Cairns       | Worker |
| 5F10          | Commercial | QLD_Cairns       | Worker |
| 5H10          | Commercial | QLD_Cairns       | Worker |
| 5A11          | Commercial | QLD_Cairns       | Worker |
| 5G10          | Commercial | QLD_Cairns       | Worker |
| 5C11          | Commercial | QLD_Cairns       | Worker |
| 5G03          | Commercial | QLD_Childers     | Worker |
| 5C03          | Commercial | QLD_Childers     | Worker |
| 5F03          | Commercial | QLD_Childers     | Worker |
| 5E03          | Commercial | QLD_Childers     | Worker |
| 5D03          | Commercial | QLD_Childers     | Worker |

|      |            |                   |        |
|------|------------|-------------------|--------|
| 5E12 | Commercial | SA                | Worker |
| 5G12 | Commercial | SA                | Worker |
| 5H12 | Commercial | SA                | Worker |
| 5D12 | Commercial | SA                | Worker |
| 5F12 | Commercial | SA                | Worker |
| 5B06 | Commercial | TAS_Wayatinah     | Worker |
| 5E06 | Commercial | TAS_Wayatinah     | Worker |
| 5F06 | Commercial | TAS_Wayatinah     | Worker |
| 5C06 | Commercial | TAS_Wayatinah     | Worker |
| 5D06 | Commercial | TAS_Wayatinah     | Worker |
| 5H11 | Commercial | TAS_Westbury      | Worker |
| 5F11 | Commercial | TAS_Westbury      | Worker |
| 5G11 | Commercial | TAS_Westbury      | Worker |
| 5B12 | Commercial | TAS_Westbury      | Worker |
| 5C12 | Commercial | TAS_Westbury      | Worker |
| 5A12 | Commercial | TAS_Westbury      | Worker |
| 5D11 | Commercial | TAS_Westbury      | Worker |
| 5A04 | Commercial | VIC_Daylesford    | Worker |
| 5B04 | Commercial | VIC_Daylesford    | Worker |
| 5G09 | Commercial | VIC_Daylesford    | Worker |
| 5D10 | Commercial | VIC_Daylesford    | Worker |
| 5G04 | Commercial | VIC_Doncaster     | Worker |
| 5H04 | Commercial | VIC_Heathcote     | Worker |
| 5B05 | Commercial | VIC_Hurstbridge   | Worker |
| 5A05 | Commercial | VIC_Hurstbridge   | Worker |
| 5F05 | Commercial | VIC_Maiden_Gully  | Worker |
| 8E05 | Commercial | VIC_Maiden_Gully  | Worker |
| 5D09 | Commercial | VIC_Maiden_Gully  | Worker |
| 5F09 | Commercial | VIC_Marong        | Worker |
| 5A06 | Commercial | VIC_Marong        | Worker |
| 5B10 | Commercial | VIC_Marong        | Worker |
| 5H05 | Commercial | VIC_Marong        | Worker |
| 5C04 | Commercial | VIC_Newstead      | Worker |
| 5D04 | Commercial | VIC_Newstead      | Worker |
| 5G05 | Commercial | VIC_St_Andrews    | Worker |
| 5E09 | Commercial | VIC_St_Andrews    | Worker |
| 5H09 | Commercial | VIC_Walkerville   | Worker |
| 5D05 | Commercial | VIC_Walkerville   | Worker |
| 5C05 | Commercial | VIC_Walkerville   | Worker |
| 5C10 | Commercial | VIC_Walkerville   | Worker |
| 5F04 | Commercial | VIC_Watsons_Creek | Worker |
| 5E04 | Commercial | VIC_Watsons_Creek | Worker |
| 5A10 | Commercial | VIC_Watsons_Creek | Worker |
| 5C08 | Commercial | WA                | Worker |
| 5A08 | Commercial | WA                | Worker |
| 5F07 | Commercial | WA                | Worker |

|      |            |                         |        |
|------|------------|-------------------------|--------|
| 5D08 | Commercial | WA                      | Worker |
| 5E07 | Commercial | WA                      | Worker |
| 5B09 | Commercial | WA                      | Worker |
| 5C07 | Commercial | WA                      | Worker |
| 5B07 | Commercial | WA                      | Worker |
| 5F08 | Commercial | WA                      | Worker |
| 5G08 | Commercial | WA                      | Worker |
| 5D07 | Commercial | WA                      | Worker |
| 5H06 | Commercial | WA                      | Worker |
| 5B08 | Commercial | WA                      | Worker |
| 5E08 | Commercial | WA                      | Worker |
| 5A09 | Commercial | WA                      | Worker |
| 5H07 | Commercial | WA                      | Worker |
| 5H08 | Commercial | WA                      | Worker |
| 9B01 | Commercial | WA_Badgingarr           | Worker |
| 9A01 | Commercial | WA_Badgingarr           | Worker |
| 9D01 | Commercial | WA_Badgingarr           | Worker |
| 4F08 | Feral      | NSW_Allyn_River         | Drone  |
| 4D08 | Feral      | NSW_Allyn_River         | Drone  |
| 4A08 | Feral      | NSW_Allyn_River         | Drone  |
| 4E08 | Feral      | NSW_Allyn_River         | Drone  |
| 4H08 | Feral      | NSW_Allyn_River         | Drone  |
| 4C08 | Feral      | NSW_Allyn_River         | Drone  |
| 4G08 | Feral      | NSW_Allyn_River         | Drone  |
| 4B08 | Feral      | NSW_Allyn_River         | Drone  |
| 4C12 | Feral      | NSW_Ashford             | Worker |
| 4G07 | Feral      | NSW_Ben_Halls_Cave_Camp | Drone  |
| 4G06 | Feral      | NSW_Ben_Halls_Cave_Camp | Drone  |
| 4H07 | Feral      | NSW_Ben_Halls_Cave_Camp | Drone  |
| 4F07 | Feral      | NSW_Ben_Halls_Cave_Camp | Drone  |
| 4H06 | Feral      | NSW_Ben_Halls_Cave_Camp | Drone  |
| 4H04 | Feral      | NSW_Darlinghurst        | Worker |
| 4E12 | Feral      | NSW_East_Tingha         | Worker |
| 4H12 | Feral      | NSW_East_Tingha         | Worker |
| 4D12 | Feral      | NSW_Ebor                | Worker |
| 4F12 | Feral      | NSW_Elsmore             | Worker |
| 4B09 | Feral      | NSW_Gloucester_Tops     | Drone  |
| 4D09 | Feral      | NSW_Gloucester_Tops     | Drone  |
| 4A09 | Feral      | NSW_Gloucester_Tops     | Drone  |
| 4C09 | Feral      | NSW_Gloucester_Tops     | Drone  |
| 4E09 | Feral      | NSW_Gloucester_Tops     | Drone  |
| 4H11 | Feral      | NSW_Grenfell            | Drone  |
| 4F11 | Feral      | NSW_Grenfell            | Drone  |
| 4C11 | Feral      | NSW_Grenfell            | Drone  |
| 4G11 | Feral      | NSW_Grenfell            | Drone  |
| 4D11 | Feral      | NSW_Grenfell            | Drone  |

|      |       |                    |        |
|------|-------|--------------------|--------|
| 4E11 | Feral | NSW_Grenfell       | Drone  |
| 4C07 | Feral | NSW_Holy_Camp      | Drone  |
| 4E07 | Feral | NSW_Holy_Camp      | Drone  |
| 4B07 | Feral | NSW_Holy_Camp      | Drone  |
| 4A07 | Feral | NSW_Holy_Camp      | Drone  |
| 4D07 | Feral | NSW_Holy_Camp      | Drone  |
| 4B12 | Feral | NSW_Inverell       | Worker |
| 4G12 | Feral | NSW_King_Plains    | Worker |
| 6C03 | Feral | NSW_Narrabri       | Worker |
| 4B10 | Feral | NSW_Piney_Range_Rd | Drone  |
| 4C10 | Feral | NSW_Piney_Range_Rd | Drone  |
| 4A10 | Feral | NSW_Piney_Range_Rd | Drone  |
| 4B11 | Feral | NSW_Piney_Range_Rd | Drone  |
| 4D10 | Feral | NSW_Piney_Range_Rd | Drone  |
| 4G09 | Feral | NSW_Stratford      | Drone  |
| 4F09 | Feral | NSW_Stratford      | Drone  |
| 4H10 | Feral | NSW_Stratford      | Drone  |
| 4G10 | Feral | NSW_Stratford      | Drone  |
| 4H09 | Feral | NSW_Stratford      | Drone  |
| 4E10 | Feral | NSW_Stratford      | Drone  |
| 4F10 | Feral | NSW_Stratford      | Drone  |
| 4A12 | Feral | NSW_Terrington     | Worker |
| 4G04 | Feral | QLD_Childers       | Worker |
| 4B04 | Feral | QLD_Childers       | Worker |
| 4F04 | Feral | QLD_Childers       | Worker |
| 4A04 | Feral | QLD_Childers       | Worker |
| 4C04 | Feral | QLD_Childers       | Worker |
| 4D04 | Feral | QLD_Childers       | Worker |
| 4E04 | Feral | QLD_Childers       | Worker |
| 9A03 | Feral | SA_Bashams_Beach   | Worker |
| 9E02 | Feral | SA_Broughton       | Worker |
| 9H02 | Feral | SA_Broughton       | Worker |
| 9D03 | Feral | SA_Halbury         | Worker |
| 9F03 | Feral | SA_Laura           | Worker |
| 9F02 | Feral | SA_Lonsdale        | Worker |
| 9B03 | Feral | SA_Pinnaroo_North  | Worker |
| 9E02 | Feral | SA_Warooka         | Worker |
| 6B03 | Feral | TAS_Wayatinah      | Worker |
| 6A03 | Feral | TAS_Wayatinah      | Worker |
| 4G05 | Feral | VIC_Black_Flat     | Drone  |
| 4A06 | Feral | VIC_Black_Flat     | Drone  |
| 6A10 | Feral | VIC_Black_Flat     | Drone  |
| 4F05 | Feral | VIC_Black_Flat     | Drone  |
| 4E05 | Feral | VIC_Black_Flat     | Drone  |
| 6H09 | Feral | VIC_Black_Flat     | Drone  |
| 4H05 | Feral | VIC_Black_Flat     | Drone  |

|      |       |                     |        |
|------|-------|---------------------|--------|
| 6B10 | Feral | VIC_Black_Flat      | Drone  |
| 4D05 | Feral | VIC_Lake_Albacattya | Drone  |
| 4A05 | Feral | VIC_Lake_Albacattya | Drone  |
| 4C05 | Feral | VIC_Lake_Albacattya | Drone  |
| 6F09 | Feral | VIC_Lake_Albacattya | Drone  |
| 4B05 | Feral | VIC_Lake_Albacattya | Drone  |
| 4D06 | Feral | VIC_Lake_Brambruk   | Drone  |
| 4C06 | Feral | VIC_Lake_Brambruk   | Drone  |
| 4B06 | Feral | VIC_Lake_Brambruk   | Drone  |
| 4E06 | Feral | VIC_Lake_Brambruk   | Drone  |
| 4E01 | Feral | VIC_Yaapeet         | Drone  |
| 4H01 | Feral | VIC_Yaapeet         | Drone  |
| 4F01 | Feral | VIC_Yaapeet         | Drone  |
| 6G09 | Feral | VIC_Yaapeet         | Drone  |
| 4G01 | Feral | VIC_Yaapeet         | Drone  |
| 6B01 | Feral | WA_Augusta          | Worker |
| 6G02 | Feral | WA_Bibra_Lake       | Worker |
| 6A01 | Feral | WA_Bremer_Bay       | Worker |
| 6G01 | Feral | WA_Canningvalle     | Worker |
| 6E01 | Feral | WA_Catholic_College | Worker |
| 6D02 | Feral | WA_Gingin           | Worker |
| 6C02 | Feral | WA_Kundit_Mine      | Worker |
| 6C01 | Feral | WA_Kundit_Mine      | Worker |
| 6B02 | Feral | WA_Mininup          | Worker |
| 4C01 | Feral | WA_Mundaring        | Worker |
| 4B01 | Feral | WA_Newdegate        | Worker |
| 4D01 | Feral | WA_Watheroo         | Worker |
